# Supplementary material
Source: PubMed Central journal article supplement (PMC5645760)
Supplement: pr7b00106_si_001.pdf [file pr7b00106_si_001.pdf]

SUPPLEMENTARY MATERIAL for

Plasma and serum metabolite association networks: comparability within and between studies using NMR and MS profiling

Maria Suarez-Diez<sup>1,\*†</sup>, Jonathan Adam<sup>2,3,4</sup>, Jerzy Adamski<sup>4,5,6</sup>, Styliani A. Chasapi<sup>7</sup>, Claudio Luchinat<sup>8,9</sup>, Annette Peters<sup>2,3,4,10</sup>, Cornelia Prehn<sup>5</sup>, Claudio Santucci<sup>8</sup>, Alexandros Spyridonidis<sup>11</sup>, Georgios A. Spyroulias<sup>7</sup>, Leonardo Tenori<sup>12</sup>, Rui Wang-Sattler<sup>2,3,4</sup>, Edoardo Saccenti<sup>1,\*†</sup>

<sup>1</sup>Laboratory of Systems and Synthetic Biology, Wageningen University & Research, Stippeneng 4 6708 WE, Wageningen, the Netherlands.

<sup>2</sup>Research Unit of Molecular Epidemiology, Helmholtz Zentrum München, 85764 München-Neuherberg, Germany.

<sup>3</sup>Institute of Epidemiology II, Helmholtz Zentrum München, 85764 München-Neuherberg, Germany.

<sup>4</sup>German Center for Diabetes Research (DZD), Helmholtz Zentrum München, 85764 München-Neuherberg, Germany.

<sup>5</sup>Institute of Experimental Genetics, Helmholtz Zentrum München, 85764 München-Neuherberg, Germany.

<sup>6</sup>Chair of Experimental Genetics, Center of Life and Food Sciences Weihenstephan, Technische Universität München, 85353 Freising, Germany.

<sup>7</sup>Department of Pharmacy, University of Patras, GR-26504, Patras, Greece.

<sup>8</sup>Magnetic Resonance Center (CERM), University of Florence, Via L. Sacconi 6, 50019 Sesto Fiorentino, Italy.

<sup>9</sup>Department of Chemistry, University of Florence, Via della Lastruccia 3, 50019 Sesto Fiorentino, Italy.

<sup>10</sup>Department of Environmental Health, Harvard School of Public Health, 02115, Boston, USA.

<sup>11</sup>Bone Marrow Transplantation Unit, University Hospital Patras, 26500 Rio, Greece.

<sup>12</sup>Department of Experimental and Clinical Medicine, University of Florence, Largo Brambilla 3, 501134, Florence, Italy.

## **Table of contents**

**Table S1** – Metabolite degree Page S4

**Table S2** – Average plasma and serum concentration Page S5

**Table S1** Observed metabolite degree, in the plasma and serum consensus network obtained for data in study I (serum and plasma obtained from different blood samples).

| #  | Metabolite        | Metabolite degree |       |
|----|-------------------|-------------------|-------|
|    |                   | Plasma            | Serum |
| 1  | Alanine           | 3                 | 0     |
| 2  | Citrate           | 6                 | 0     |
| 3  | Proline           | 3                 | 0     |
| 4  | Oxoglutarate      | 9                 | 3     |
| 5  | Histidine         | 13                | 8     |
| 6  | Acetate           | 11                | 8     |
| 7  | HDL               | 9                 | 7     |
| 8  | Threonine         | 9                 | 7     |
| 9  | Methionine        | 3                 | 3     |
| 10 | Acetoacetate      | 7                 | 7     |
| 11 | Pyruvate          | 6                 | 7     |
| 12 | Arginine          | 15                | 18    |
| 13 | 3-Hydroxybutyrate | 9                 | 11    |
| 14 | LDL               | 6                 | 8     |
| 15 | Creatinine        | 7                 | 10    |
| 16 | Serine            | 7                 | 10    |
| 17 | Isoleucine        | 9                 | 14    |
| 18 | Formate           | 24                | 42    |
| 19 | Glutamine         | 6                 | 11    |
| 20 | Leucine           | 9                 | 17    |
| 21 | Tyrosine          | 13                | 25    |
| 22 | Glucose           | 4                 | 8     |
| 23 | Dimethylglycine   | 11                | 24    |
| 24 | Lysine            | 7                 | 16    |
| 25 | Valine            | 9                 | 24    |
| 26 | Phenylalanine     | 3                 | 10    |
| 27 | Creatine          | 6                 | 23    |
| 28 | NAG1              | 6                 | 40    |
| 29 | VLDL              | 0                 | 3     |

**Table S2** Average plasma and serum concentration (expressed in arbitrary units) and standard error (S.E.) of 29 metabolites measured using NMR. All difference are significant ( $P < 10^{-4}$ ) after Bonferroni correction for multiple testing except for 3-Hydroxybutyrate. For Plasma and serum data obtain via FIA-MS please refer to the paper <http://journals.plos.org/plosone/article?id=10.1371/journal.pone.0021230>.

| Metabolite        | Plasma   |          | Serum    |          |
|-------------------|----------|----------|----------|----------|
|                   | Mean     | S.E.     | Mean     | S.E.     |
| 3-Hydroxybutyrate | 6.63E-05 | 0.000294 | 6.72E-05 | 0.000531 |
| Acetate           | 0.000204 | 9.94E-05 | 0.000305 | 0.000153 |
| Acetoacetate      | 0.003214 | 0.002644 | 0.005893 | 0.003923 |
| Alanine           | 0.00508  | 0.000638 | 0.004292 | 0.001053 |
| Arginine          | 0.002531 | 0.000421 | 0.003727 | 0.000868 |
| Citrate           | 0.000315 | 0.000396 | 0.002029 | 0.00345  |
| Creatine          | 7.27E-05 | 6.43E-05 | 0.004237 | 0.00094  |
| Creatinine        | 0.00038  | 7.43E-05 | 0.000524 | 0.000131 |
| Dimethylglycine   | 5.13E-05 | 4.45E-05 | 8.89E-05 | 8.49E-05 |
| Formate           | 0.000124 | 7.88E-05 | 2.91E-05 | 2.44E-05 |
| Glucose           | 0.00437  | 0.00101  | 0.007124 | 0.001537 |
| Glutamine         | 0.001767 | 0.001008 | 0.003891 | 0.000948 |
| HDL               | 0.005826 | 0.002665 | 0.048072 | 0.028138 |
| Histidine         | 0.000263 | 9.91E-05 | 0.000637 | 0.000194 |
| Isoleucine        | 0.000219 | 4.86E-05 | 0.000308 | 8.5E-05  |
| LDL               | 0.06845  | 0.006462 | 0.109332 | 0.014234 |
| Leucine           | 0.001022 | 0.000298 | 0.001395 | 0.000398 |
| Lysine            | 2.23E-05 | 3.87E-05 | 4.35E-05 | 2.23E-05 |
| Methionine        | 0.005932 | 0.000858 | 0.000471 | 0.000186 |
| NAG1              | 0.005945 | 0.000859 | 0.008942 | 0.001839 |
| Oxoglutarate      | 0.000123 | 3.96E-05 | 9.09E-05 | 6.32E-05 |
| Phenylalanine     | 0.000256 | 5.34E-05 | 0.000555 | 0.00012  |
| Proline           | 0.000907 | 0.000238 | 0.001388 | 0.000413 |
| Pyruvate          | 0.000704 | 0.000201 | 0.000542 | 0.000325 |
| Serine            | 0.000855 | 0.000432 | 0.001877 | 0.000528 |
| Threonine         | 0.031093 | 0.012221 | 0.029297 | 0.012401 |
| Tyrosine          | 0.000321 | 6.53E-05 | 0.000427 | 0.00011  |
| Valine            | 0.001818 | 0.000336 | 0.002723 | 0.000667 |
| VLDL              | 0.003199 | 0.002934 | 0.006186 | 0.004341 |
